# Supplementary material
Source: PubMed Central journal article supplement (PMC4267131)
Supplement: Supp_Figure1.pdf [file Supp_Figure1.pdf]

## Supplementary Data

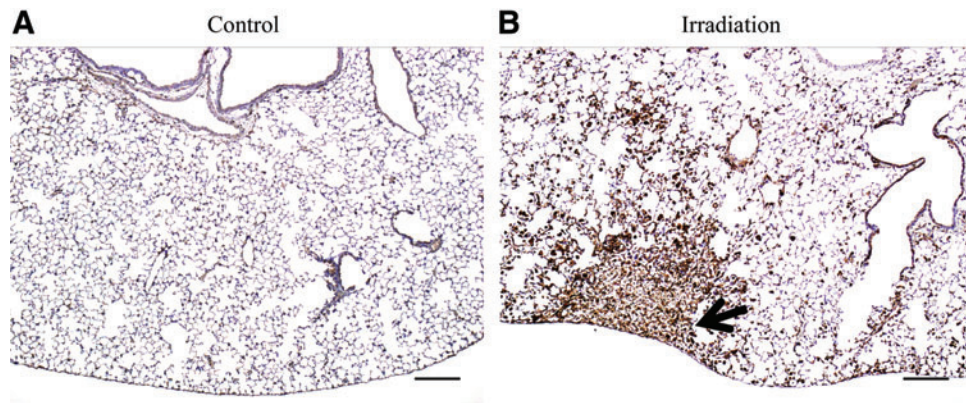

**SUPPLEMENTARY FIG. S1.** S100A4 immunostaining for control and irradiated mouse lung tissue. **(A)** There was minimal S100A4 staining in lung tissue from control mice. **(B)** Irradiation of mice with a single dose of 14 Gy led to fibrosis of alveolar septa 16 weeks post irradiation indicated by the increase of S100A4 positive cells (*brown staining*), especially in the subpleural region (*black arrow*). Scale bars: 200  $\mu\text{m}$ .
