# Supplementary material
Source: PubMed Central journal article supplement (PMC4267131)
Supplement: Supp_Figure2.pdf [file Supp_Figure2.pdf]

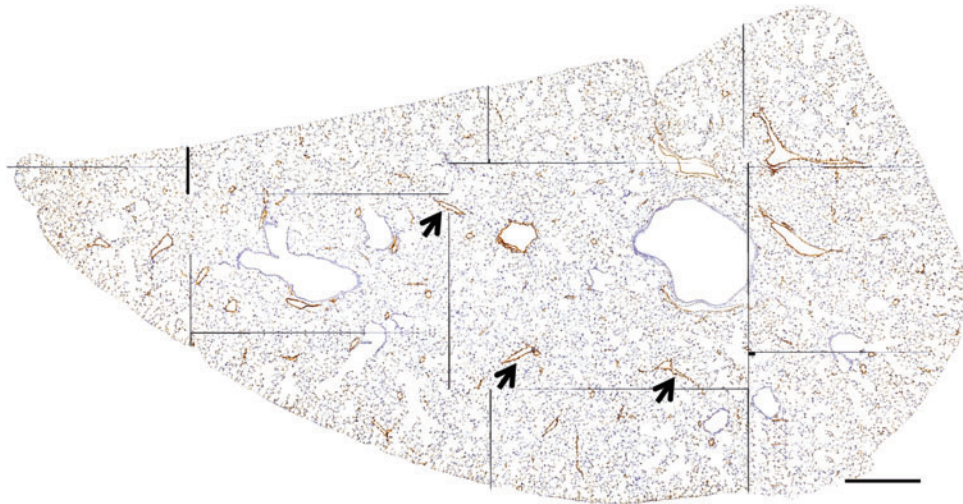

**SUPPLEMENTARY FIG. S2.** Representative digital reconstruction of panoramic image of LYVE-1 stained control mouse lung. Multiple photomicrographs of immunostaining were captured and stitched to create panoramic images of entire tissue sections. The number, perimeter, and area of lymphatic vessels (*brown areas indicated by black arrows*) were quantified and subsequently adjusted to the cross sectional area of the entire stitched tissue. Scale bars: 500  $\mu\text{m}$ .
