# Supplementary material
Source: PubMed Central journal article supplement (PMC4267131)
Supplement: Supp_Figure3.pdf [file Supp_Figure3.pdf]

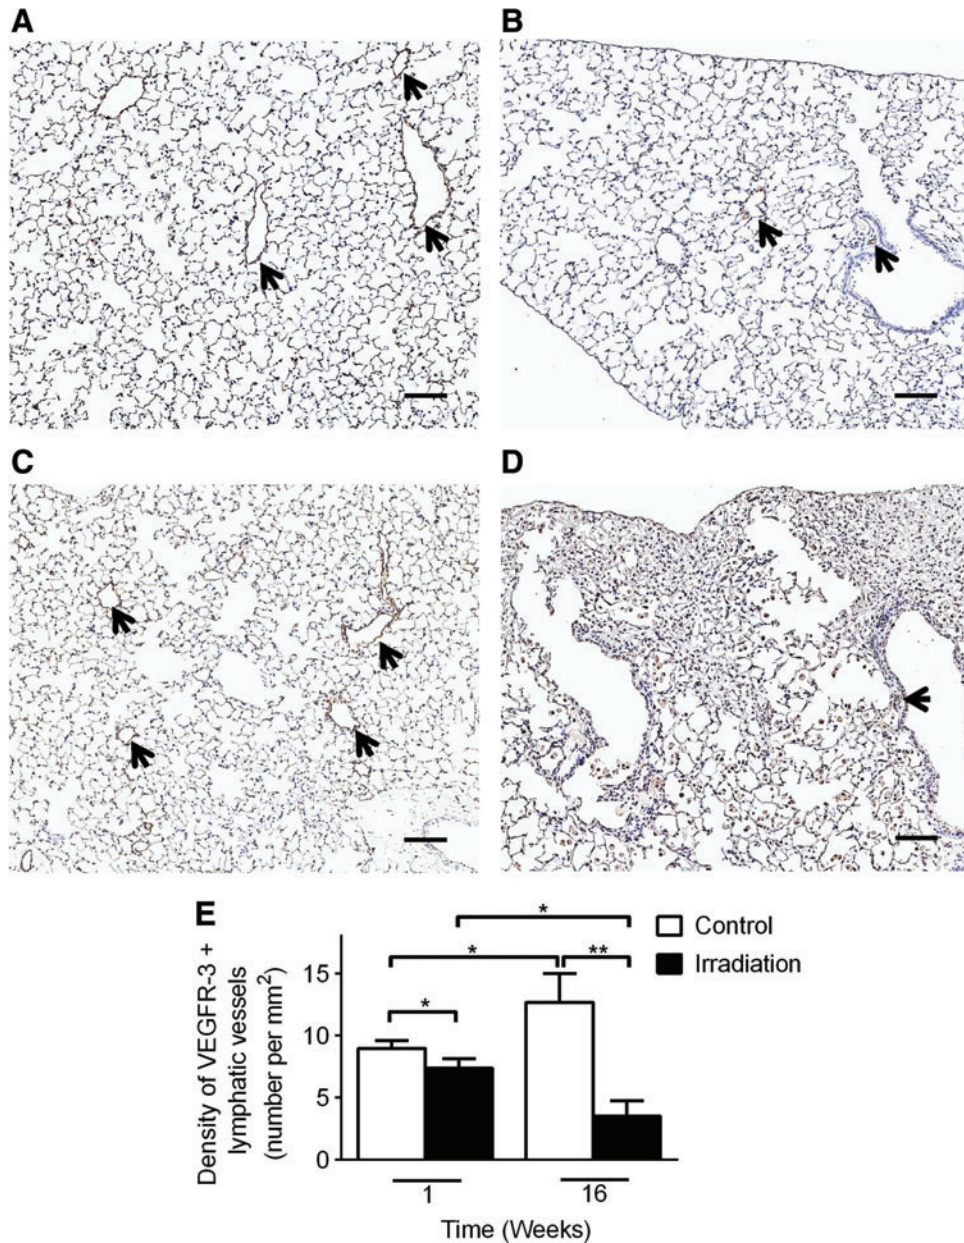

**SUPPLEMENTARY FIG. S3.** VEGFR-3 staining and quantification of VEGFR-3 positive lymphatic vessels. One week after a single dose (14 Gy) of radiation, radiated lungs (**B**) show a marked decrease in immunoreactivity with anti-VEGFR-3 antibodies (*brown areas indicated by black arrows*) compared to control nonradiated lungs (**A**). At 16 weeks post-radiation, the decrease in immunoreactivity with anti-VEGFR-3 antibodies persisted as seen in lung tissue sections from nonradiated (**C**) and radiated animals (**D**). Scale bar: 100  $\mu$ m. Images of the entire lung section were obtained. ImageJ software was used to measure the density of lymphatic vessels in tissue sections from radiated and control animals at the indicated time points ( $n=3$  per group per time point) (**E**); \* $p < 0.05$ ; \*\* $p < 0.01$ , by Student  $t$  test.
