# Supplementary material
Source: PubMed Central journal article supplement (PMC4267131)
Supplement: Supp_Figure4.pdf [file Supp_Figure4.pdf]

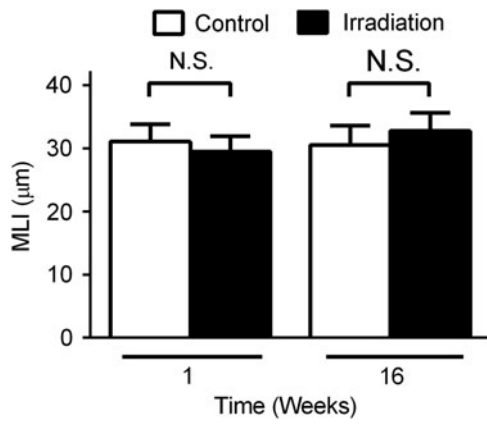

**SUPPLEMENTARY FIG. S4.** Radiation exposure does not affect air space dimensions in mouse lung. Morphometric analysis confirmed that there was no significant difference in mean linear intercept (MLI) between control and irradiated mice at week 1 and week 16 ( $n=3$  per group per time point); N.S., not significant, by Student  $t$  test.
